# Supplementary material for: Fundamental understanding of the synthesis of well-defined supported non-noble metal intermetallic compound nanoparticles
Source: Royal Society of Chemistry journal article supplement (doi:10.1039/d2cy00183g), 2022-01-01
Supplement: d2cy00183g1.pdf [file d2cy00183g1.pdf]

# Fundamental Understanding of the Synthesis of Well-Defined Supported Non-noble Metal Intermetallic Compounds Nanoparticles

Yuanjun Song,<sup>†</sup> Yang He,<sup>‡</sup> and Siris Laursen\*,<sup>¶</sup>

*<sup>†</sup>Joint International Research Laboratory of Information Display and Visualization, School  
of Electronic Science and Engineering, Southeast University, Nanjing, 210096, People's  
Republic of China*

*<sup>‡</sup>Chemical Science Division, Oak Ridge National Laboratory, Oak Ridge, Tennessee 37831,  
United States*

*<sup>¶</sup>Department of Chemical and Biomolecular Engineering, University of Tennessee,  
Knoxville, Tennessee 37996, United States*

E-mail: [slaursen@utk.edu](mailto:slaursen@utk.edu)

Phone: +1 865 9745786

## Content

**Figure S1.** EDX-mappings of SiO<sub>2</sub> supported a) Ni<sub>3</sub>Ga and b) Ni<sub>5</sub>Ga<sub>3</sub> (nominal loadings of Ni:Ga were 3:1 and 5:3 respectively), which were synthesized using incipient wetness impregnation method and reduced at 700°C with pure H<sub>2</sub> for 2hrs. The elements were color coded as: Ni (red), Ga (green), and Si (blue).

**Figure S2.** Phase pure supported IMCs synthesized in this study: a) SiO<sub>2</sub> supported Ni<sub>3</sub>Ga, Ni<sub>5</sub>Ga<sub>3</sub>, NiGa, and Ni<sub>2</sub>Ga<sub>3</sub>; b) Al<sub>2</sub>O<sub>3</sub> supported Ni<sub>3</sub>Ga, Ni<sub>5</sub>Ga<sub>3</sub>, NiGa, and Ni<sub>2</sub>Ga<sub>3</sub>; c) SiO<sub>2</sub> supported CoGa; and d) SiO<sub>2</sub> supported Ni<sub>2</sub>In and Ni<sub>2</sub>In<sub>3</sub>.

**Table S1.** Summary of percentage of targeted phase (NiGa) of reduced 1:1 Ni:Ga/C, 1:1 Ni:Ga/SiO<sub>2</sub>, and 1:1 Ni:Ga/Al<sub>2</sub>O<sub>3</sub> with different H<sub>2</sub> chemical potential. The minimum required H<sub>2</sub> chemical potential to produce pure NiGa phase for each catalyst is highlighted with red color.

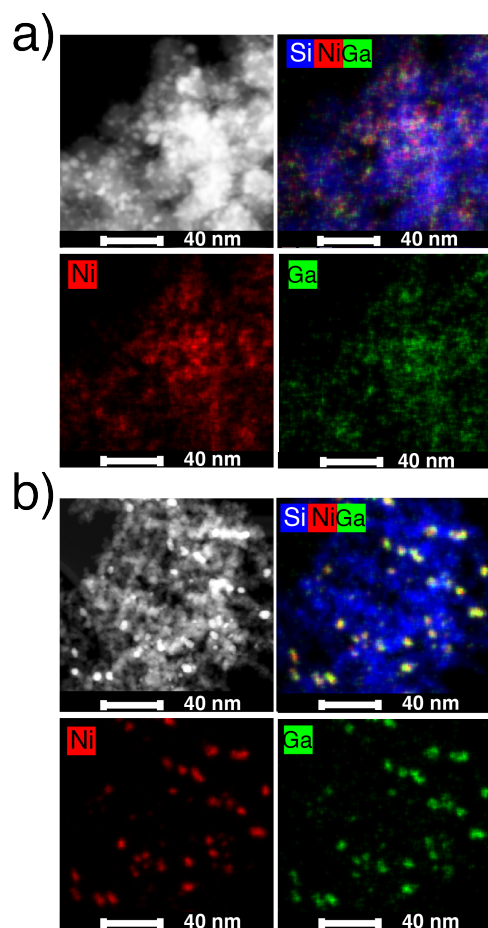

**Figure S1:** EDX-mappings of SiO<sub>2</sub> supported a) Ni<sub>3</sub>Ga and b) Ni<sub>5</sub>Ga<sub>3</sub> (nominal loadings of Ni:Ga were 3:1 and 5:3 respectively), which were synthesized using incipient wetness impregnation method and reduced at 700°C with pure H<sub>2</sub> for 2hrs. The elements were color coded as: Ni (red), Ga (green), and Si (blue).

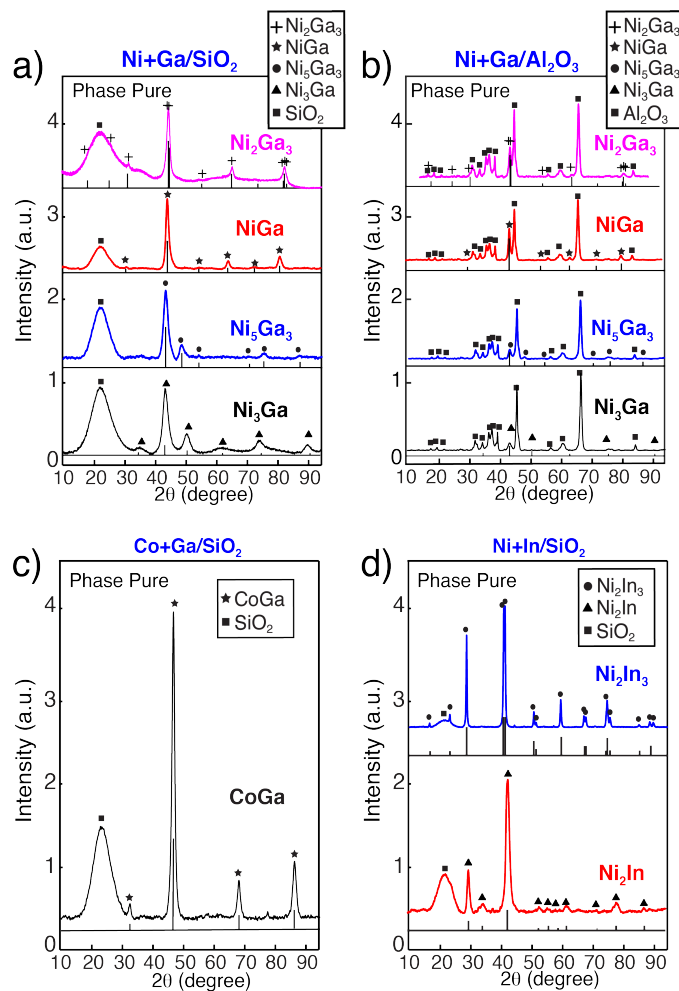

**Figure S2:** Phase pure supported IMCs synthesized in this study: a) SiO<sub>2</sub> supported Ni<sub>3</sub>Ga, Ni<sub>5</sub>Ga<sub>3</sub>, NiGa, and Ni<sub>2</sub>Ga<sub>3</sub>; b) Al<sub>2</sub>O<sub>3</sub> supported Ni<sub>3</sub>Ga, Ni<sub>5</sub>Ga<sub>3</sub>, NiGa, and Ni<sub>2</sub>Ga<sub>3</sub>; c) SiO<sub>2</sub> supported CoGa; and d) SiO<sub>2</sub> supported Ni<sub>2</sub>In and Ni<sub>2</sub>In<sub>3</sub>.

Table 1: Summary of percentage of targeted phase (NiGa) of reduced 1:1 Ni:Ga/C, 1:1 Ni:Ga/SiO<sub>2</sub>, and 1:1 Ni:Ga/Al<sub>2</sub>O<sub>3</sub> with different H<sub>2</sub> chemical potential. The minimum required H<sub>2</sub> chemical potential to produce pure NiGa phase for each catalyst is highlighted with red color.

| Catalyst                                | H <sub>2</sub> Chemical Potential |      |      |     |      |      |
|-----------------------------------------|-----------------------------------|------|------|-----|------|------|
|                                         | 2%                                | 5%   | 10%  | 30% | 50%  | 100% |
| 1:1 NiGa/C                              | 68%                               | 100% | NA   | NA  | NA   | 100% |
| 1:1 NiGa/SiO <sub>2</sub>               | 0                                 | 55%  | 100% | NA  | NA   | 100% |
| 1:1 NiGa/Al <sub>2</sub> O <sub>3</sub> | 0                                 | 0    | 0    | 0   | 100% | 100% |
